# Supplementary material
Source: PubMed Central journal article supplement (PMC5670003)
Supplement: NIHMS896201-supplement-supplement_1.pdf [file NIHMS896201-supplement-supplement_1.pdf]

## SUPPLEMENTAL MATERIALS

**Supplemental Table 1. Change from baseline over 12 weeks for Global Assessment of Symptoms: “Overall, how would you rate your symptoms in the past 7 days?”**

| Symptom                                       | Mean±SD            | Placebo<br>N=90 | 10 mg<br>N=83 | 30 mg<br>N=93 | 100 mg<br>N=63 |
|-----------------------------------------------|--------------------|-----------------|---------------|---------------|----------------|
| <b>Overall<br/>Gastroparesis<br/>Symptoms</b> | Baseline Score     | 2.3 ±0.8        | 2.3 ±0.7      | 2.3 ±0.7      | 2.4 ±0.7       |
|                                               | Week 12 score      | 1.4 ±0.7        | 1.2 ±0.9      | 1.3 ±0.8      | 1.2 ±0.8       |
|                                               | LS Mean Δ from Pbo |                 | -0.29         | -0.18         | -0.28          |
|                                               | P-value            |                 | 0.014         | 0.113         | 0.027          |
| <b>Nausea</b>                                 | Baseline Score     | 2.1 ±0.7        | 2.2 ±0.8      | 2.2 ±0.7      | 2.4 ±0.7       |
|                                               | Week 12 score      | 1.4 ±0.8        | 1.2 ±0.9      | 1.2 ±0.9      | 1.1 ±0.8       |
|                                               | LS Mean Δ from Pbo |                 | -0.27         | -0.24         | -0.36          |
|                                               | P-value            |                 | 0.038         | 0.062         | 0.012          |
| <b>Post-prandial<br/>Fullness</b>             | Baseline Score     | 2.9 ±0.9        | 3.0 ±1.0      | 3.0 ±0.8      | 2.9 ±0.9       |
|                                               | Week 12 score      | 2.3 ±0.9        | 2.0 ±0.9      | 1.9 ±0.9      | 2.0 ±0.9       |
|                                               | LS Mean Δ from Pbo |                 | -0.34         | -0.35         | -0.23          |
|                                               | P-value            |                 | 0.013         | 0.009         | 0.012          |
| <b>Bloating</b>                               | Baseline Score     | 2.3 ±0.8        | 2.4 ±0.8      | 2.3 ±0.7      | 2.4 ±0.8       |
|                                               | Week 12 score      | 1.6 ±0.9        | 1.4 ±0.9      | 1.3 ±0.8      | 1.3 ±1.0       |
|                                               | LS Mean Δ from Pbo |                 | -0.26         | -0.24         | -0.33          |
|                                               | P-value            |                 | 0.051         | 0.054         | 0.022          |
| <b>Abdominal<br/>Pain</b>                     | Baseline Score     | 2.0 ±0.8        | 2.1 ±0.9      | 1.9 ±0.8      | 2.0 ±0.9       |
|                                               | Week 12 score      | 1.2 ±0.8        | 1.1 ±0.9      | 1.1 ±0.9      | 0.9 ±0.9       |
|                                               | LS Mean Δ from Pbo |                 | -0.18         | -0.14         | -0.33          |
|                                               | P-value            |                 | 0.166         | 0.265         | 0.020          |

**Supplemental Figure 1. Improvements in GCSI-DD at week 12 (p comparisons vs. placebo)**

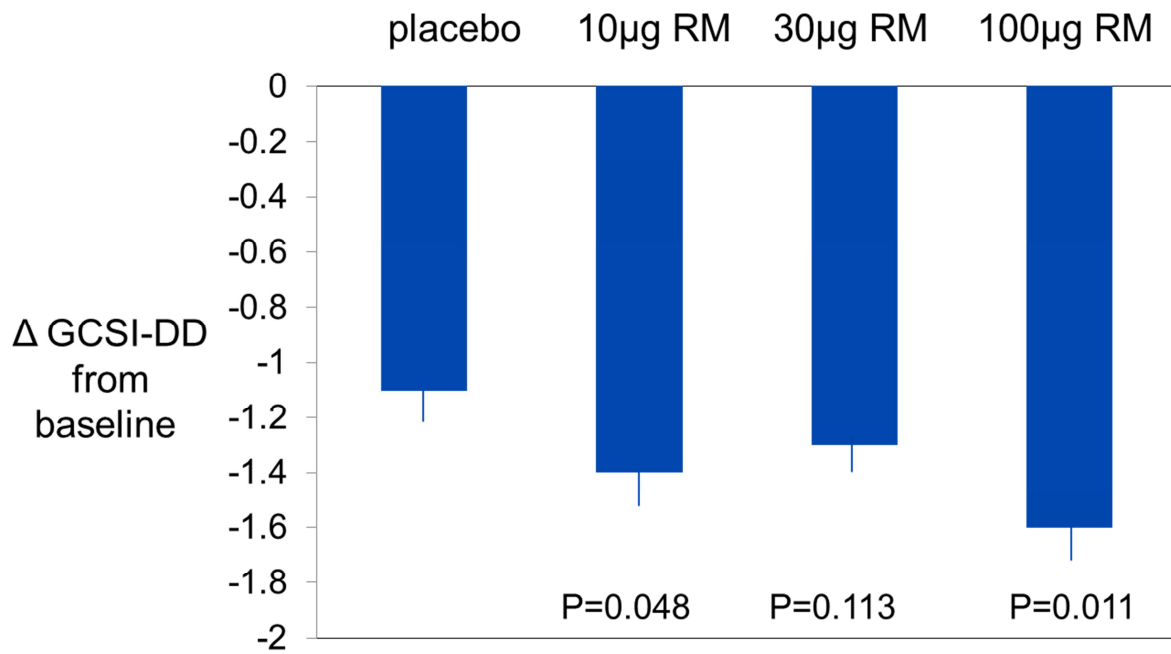

Data mean + SEM; P comparison with placebo

**Supplemental Figure 2. Percent decrease in gastric emptying  $T_{1/2}$  at end of treatment period compared to baseline in each group.**

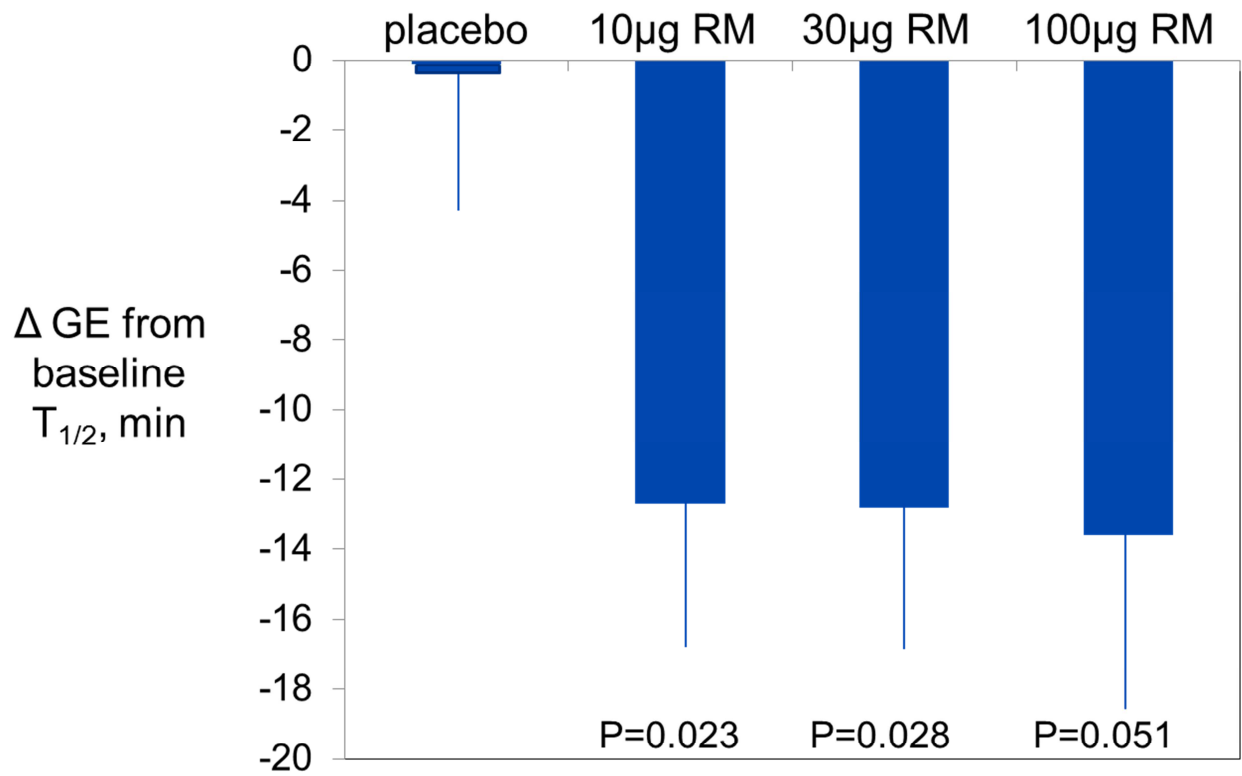

Data mean + SEM
